# Supplementary material
Source: PubMed Central journal article supplement (PMC3138809)
Supplement: NIHMS275760-supplement-Suppl_Figures_1_and_3.pdf [file NIHMS275760-supplement-Suppl_Figures_1_and_3.pdf]

## Supplementary Data

### Supplemental Figure 1

#### 1A

```

1                               50
SV2_Human_BAA34456 (1) SAPSPIMEEGFRDRAAFIRGAKDIAKEVKKHAAKKVVKGLDRVQDEYSRR
SV2_AAEL005849 (1) -----MVESETDS

51                               100
SV2_Human_BAA34456 (51) SYSRFEEDDDDDFPAPSDGYRGEQTQDEEEGGASSDATEGHDEDEDEITY
SV2_AAEL005849 (9) KHSKYTNVKDDRANGVGSNEYPTVSSEK-----ASKADHIH

101                              150
SV2_Human_BAA34456 (101) EGEYQIGIPRAESGGKGERMADGAPLAGVRGGLSDGEGPPGGRGEAQRKE
SV2_AAEL005849 (47) QTGLQIVASKQ-----DKASLDAERGYTSKAD-----

151                              200
SV2_Human_BAA34456 (151) REELAQQYFAILRECCHGRFQWTLYFVLGLALMADGVEVFFVGFVLPSPAE
SV2_AAEL005849 (74) -----FEQAIELTGYGKFHYILLAICGLVSTSEEMDVISMSFILPSAQ

201                              250
SV2_Human_BAA34456 (201) KDMCLSDSNKGMGLIVYLGMMVGAFLWGGLADRLGRRQCLLISLSVNSV
SV2_AAEL005849 (117) CDLDLNTQTKGWLNSTIIFI GMMVGAYAWGVSADSLGRKKVLIIVISIMNAI

251                              300
SV2_Human_BAA34456 (251) FAFFSSFVQGYGTFLLFCRLLSGVGIGGSIPIVFSYFSEFLAQEKRGEHLS
SV2_AAEL005849 (167) CIVASSFSQSYEVFMVFRFLNGAALGGSGPVIWSYFAEQPKAKRGSMLS

301                              350
SV2_Human_BAA34456 (301) WLCMFWMIGGVYAAAMAWAIIIPHYGWSFQMGSAYQFHSWRVFVLVCAFPS
SV2_AAEL005849 (217) FMAAFWTIGNLLVAGLAWLIIP TNIGFYTP--AFTFNSWRIFLMVCSIPS

351                              400
SV2_Human_BAA34456 (351) VFAIGALTTQPESPRFFLENGKHXDEAWMV LKQVHDTNMRKAGHPERVFSV
SV2_AAEL005849 (265) FVVAGLLLYLPESPKFLLSQGKFEEALAI FRGIYVTNTGKS-----ADL

401                              450
SV2_Human_BAA34456 (401) THIKTIHQEDELIEIQSDTGTWYQRWGVRALSLGGQVWGNFLSCFGPEYR
SV2_AAEL005849 (309) YPVKELLIDEQLRNELADVKKPIKNKYKRMLHN---IMDN SKQLFMSPIL
```

|                    |       |                                                      |  |     |
|--------------------|-------|------------------------------------------------------|--|-----|
|                    |       | 451                                                  |  | 500 |
| SV2_Human_BAA34456 | (451) | RITLMMMGVWFTMSFSYYGLTVWFPDMIRHLQAVDYASRTKVFPGERVEH   |  |     |
| SV2_AAEL005849     | (356) | KFTLLISITINFTHIGYYGLMMWFPELFNRFDEFIRAHDPDIEEAG-----  |  |     |
|                    |       | 501                                                  |  | 550 |
| SV2_Human_BAA34456 | (501) | VTFNFTLENQIHRGGQYFNDKFIGLRLKSVSFEDSLFEECYFEDVTSNT    |  |     |
| SV2_AAEL005849     | (401) | -----                                                |  |     |
|                    |       | 551                                                  |  | 600 |
| SV2_Human_BAA34456 | (551) | FFRNCTFINTVFYNTDLFEYKQVNSRLINSTFLHNKEGCPLDVTGTGEGA   |  |     |
| SV2_AAEL005849     | (401) | ---VCQVTDYVVGHGSHGESGVCSATIPSTVFLES-----             |  |     |
|                    |       | 601                                                  |  | 650 |
| SV2_Human_BAA34456 | (601) | YMVYFVSFLGTLAVLPGNIIVSALLMDKIIGRLRMLAGSSVMSCVSCFFLSF |  |     |
| SV2_AAEL005849     | (433) | -----LITVAAALPANVIAVLGMDKLGKFFLVFSTMSAGFCSASMYF      |  |     |
|                    |       | 651                                                  |  | 700 |
| SV2_Human_BAA34456 | (651) | GNSESAMIALLCLEFGVSIASWNALDVLTVELYPSDKRTTAFGFLNALCK   |  |     |
| SV2_AAEL005849     | (476) | VTNKNQNLAVSAIFSGVISMGNASLDCLITEVFPTN-----            |  |     |
|                    |       | 701                                                  |  | 748 |
| SV2_Human_BAA34456 | (701) | LAAVLGISIFTSFVGITKAAPILFASAALALGSSLALKLPETRGQVLQ     |  |     |
| SV2_AAEL005849     | (512) | -----                                                |  |     |

## 1B

|                          |       |                                                     |  |     |
|--------------------------|-------|-----------------------------------------------------|--|-----|
|                          |       | 1                                                   |  | 50  |
| Unc93A.AAEL004048        | (1)   | MHGGFDPKNDKSVSLRDKVTLDRSEKWRILKNITTVSFAFMVQFTAFQGT  |  |     |
| Unc93A.human.CAD48541    | (1)   | -----MDRS-----LRNVLVVSFGFLLFTAYGGL                  |  |     |
| Unc93AENSMUSG00000056133 | (1)   | -----MERS-----LKNVLVVSFCGFLFTAYGGL                  |  |     |
|                          |       | 51                                                  |  | 100 |
| Unc93A.AAEL004048        | (51)  | ANLQSSINAKDGLGTVSLSAIYAALVVSCIFLPTLVIRKLTAKWTLQVSM  |  |     |
| Unc93A.human.CAD48541    | (26)  | QSLQSSLYSEEGLGVTALSTLYGGMLLSSMFLPPLLIERLGCKGTIILSM  |  |     |
| Unc93AENSMUSG00000056133 | (26)  | QNLQSSLYSEQGLGVATLSTLYASVLLSSMFLPPILIKKCGCKWTIVGSM  |  |     |
|                          |       | 101                                                 |  | 150 |
| Unc93A.AAEL004048        | (101) | LCYAPYIAAQFYPTFYTLVPAGILVGLGAAPMWASKATYLTQLGQVYAKL  |  |     |
| Unc93A.human.CAD48541    | (76)  | CGYVAFVSVGNFFASWYTLIPTSILLGLGAAPLWSAQCTYLTITGNTHAEK |  |     |
| Unc93AENSMUSG00000056133 | (76)  | CCYVVFSLGNFHANWYTLIPTSILLGLGAAPLWSAQCTYLTITMGNLQAEK |  |     |
|                          |       | 151                                                 |  | 200 |
| Unc93A.AAEL004048        | (151) | TEQSVEAIIIVRFQGFFLAWQTAELWGNLISSLVLSGAGGGSVHSDNE    |  |     |
| Unc93A.human.CAD48541    | (126) | AGKRGKDMVNQYFGIFFLIFQSSGVWGNLISSLVFGQTPS-----Q      |  |     |
| Unc93AENSMUSG00000056133 | (126) | VGKLGKDVVNQYFGIFFLVFQSSGVWGNLISSLVFGKMSM-----Q      |  |     |
|                          |       | 201                                                 |  | 250 |

|                          |       |                                                     |
|--------------------------|-------|-----------------------------------------------------|
| Unc93A.AAEL004048        | (201) | TSMGDLALAKCGANFCVVETDDNANLQRPDPNEIFEISAIYLSCTIAAVV  |
| Unc93A.human.CAD48541    | (167) | ETLPEEQLTSCGASDCLMATTTTNSTQRPSQQLVYTLLGIYTGSGVLAVL  |
| Unc93AENSMUSG00000056133 | (167) | EAIPEEQLMSCGAKDCLMGPAATNSTHHPSQQLIYTLLGIYTGCGVLAIL  |
|                          |       | 251 300                                             |
| Unc93A.AAEL004048        | (251) | IITALFMDPLSRYGKRRGSISAIEVSGVQLLSATFKQLKKVNQQLLILIT  |
| Unc93A.human.CAD48541    | (217) | MIAAFLQPIRDVQR--ESEGEKKSVPFWSTLLSTFKLYRDKRLCLLILLP  |
| Unc93AENSMUSG00000056133 | (217) | LVAVFLESLEDKLEN-EGERRPRPPPLWSTLLSTFMLFRDKRLCLLMFLP  |
|                          |       | 301 350                                             |
| Unc93A.AAEL004048        | (301) | VFIGMEQAFIGAEFTQAYVSCALGIHQIGYVMICFGVVNAICSIIFGSIM  |
| Unc93A.human.CAD48541    | (265) | LYSGLQOGFLSSEYTRSIVTCTLGIQFVGYVMICFSATDALCSVLYGKVS  |
| Unc93AENSMUSG00000056133 | (266) | LYSGFQQEFLSGEYTKSYVTCALGIHFVGYVMICFSAMTALCSLLYGKIS  |
|                          |       | 351 400                                             |
| Unc93A.AAEL004048        | (351) | KYIGRIPITLLGALVHGGVITTYCLFWKPHPDHALVFFAISGLWGVGDAVW |
| Unc93A.human.CAD48541    | (315) | QYTGRAVLVYLGAVTHVSCMIALLWRPRADHLAVFFVFSGLWGVADAVW   |
| Unc93AENSMUSG00000056133 | (316) | KYTGRAALYALGAAIHFSVVFLLWHPNTNQLPVFFVLSGLWGMSDAVW    |
|                          |       | 401 450                                             |
| Unc93A.AAEL004048        | (401) | QTQINGIYGALFRRNKEAAFSNYRLWESAGFVIAYAYSTQLCARMKLYIL  |
| Unc93A.human.CAD48541    | (365) | QTQNNALYGVLFEKSKEAAFANYRLWEALGFVIAFGYSMFLCVHVKLYIL  |
| Unc93AENSMUSG00000056133 | (366) | QTQNNALFGVLFEENKEPAFANYRLGEAIGFVIAFGYSSFLCVSTKLYIL  |
|                          |       | 451 500                                             |
| Unc93A.AAEL004048        | (451) | FAVLALGMVGYAIVEIRHLNKERRLKKLEDTPKQQQTEAERKEIEEDDEK  |
| Unc93A.human.CAD48541    | (415) | LGVLSTMTMVAAYGLVECVESK-----NPIRPHAPGQVNQAEDEEIQ     |
| Unc93AENSMUSG00000056133 | (416) | LGVLSLAMVGYGTVEYLEVK-----AASKVLGAEKKNQAEDEEEMK      |
|                          |       | 501 512                                             |
| Unc93A.AAEL004048        | (501) | DELEEDIVVTHL                                        |
| Unc93A.human.CAD48541    | (455) | TKM-----                                            |
| Unc93AENSMUSG00000056133 | (456) | TKM-----                                            |

## Supplemental Figure 2

CRE .xls File

Supplemental Figure 3

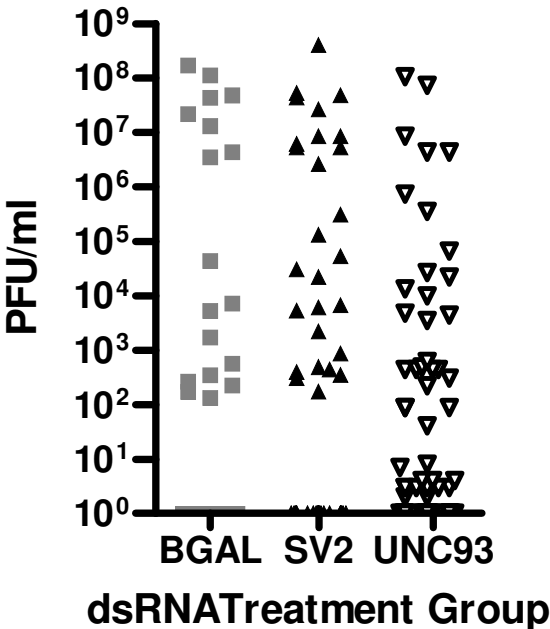

Supplemental Figure 4.

.avi video confocal images
